# Supplementary material
Source: PubMed Central journal article supplement (PMC3540834)
Supplement: supp_M027482_suppdata.pdf [file supp_M027482_suppdata.pdf]

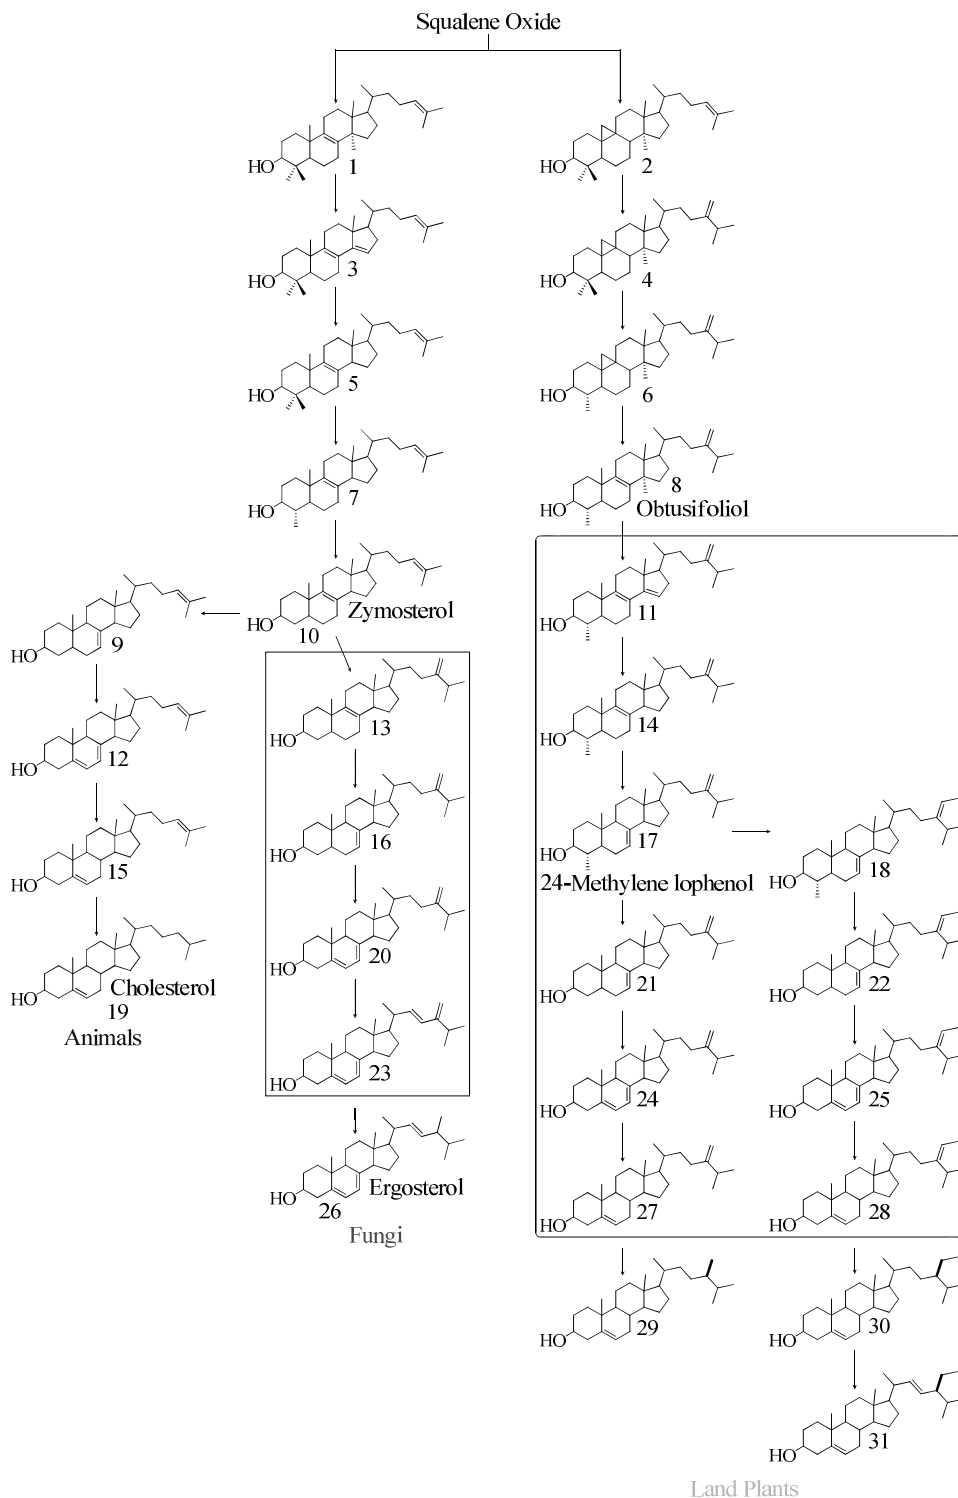

**Supplemental Figure 1.** Sterol biosynthesis pathways in Eukarya as adapted from Bouvier F. et al. 2005. *Prog. Lipid Res.* **44**: 357-429 and Desmond E. and S. Gribaldo, 2010. *Genome Biol. Evol.* **1**: 364-381. Note- alternate routes can develop as reported by Fliesler, S. J. and L. Bretillon, *J. Lipid Res.* 2010. **51**: 3399-3413, and Porter, F. D. and G. E. Herman. 2011. *J. Lipid Res.* **52**: 6-34.

**Supplemental Table 1.** <sup>1</sup>HNMR signals of sterols isolated from *Chlamydomonas reinhardtii*

| Sterol                                                        | Structure <sup>a</sup> | $\alpha_c$ <sup>b</sup> | H-18      | H-19      | H-21      | H-26      | H-27                   | H-28      | H-29      | Olefinic Protons                                                    |
|---------------------------------------------------------------|------------------------|-------------------------|-----------|-----------|-----------|-----------|------------------------|-----------|-----------|---------------------------------------------------------------------|
| Ergosta-5,7,22E-trienol<br>(C <sub>28</sub> )                 | 14                     | 0.90                    | 0.632 (s) | 0.948 (s) | 1.038 (d) | 0.844 (d) | 0.821(d)               | 0.919(d)  |           | H6, 5.573 (dd)<br>H7, 5.380 (m)<br>H22, 5.167 (d)<br>H23, 5.235 (d) |
| Porifersta-5,7,22E-trienol<br>(C <sub>29</sub> )              | 16                     | 1.05                    | 0.644 (s) | 0.957 (s) | 1.059 (d) | 0.857 (d) | 0.846 (d)              |           | 0.828 (t) | H6, 5.573 (dd)<br>H7, 5.380 (m)<br>H22, 5.167 (d)<br>H23, 5.235 (d) |
| Ergosta-5,7-dienol<br>(C <sub>28</sub> )                      | 12                     | 1.01                    | 0.616 (s) | 0.944 (s) | 0.941 (d) | 1.636 (s) | 0.776 (s)              | 0.857 (d) | -         | H6, 5.573 (dd)<br>H7, 5.380 (m)                                     |
| Porifersta-5,7-dienol<br>(C <sub>29</sub> )                   | 15                     | 1.13                    | 0.618 (s) | 0.943 (s) | 0.95 (d)  | 0.812 (d) | 0.831 (d)              |           | 0.857 (t) | H6, 5.573 (dd)<br>H7, 5.380 (m)                                     |
| Ergosta-5,7, 25(27)-<br>trienol<br>(C <sub>28</sub> )         | 21                     | 0.76 <sup>c</sup>       | 0.621 (s) | 0.951 (s) | 0.945 (d) | 1.648 (s) | 4.672<br>(brd)         | 1.006 (d) |           | H6, 5.573 (dd)<br>H7, 5.380 (m)<br>H27, 4.672 (brd)                 |
| Ergosta-7,25(27)-dienol<br>(C <sub>28</sub> )                 | 8                      | 0.85                    | 0.527 (s) | 0.793 (s) | 0.916 (d) | 1.636 (s) | 4.672<br>(brd)         | 0.993 (d) |           | H7, 5.155 (dd)<br>H27, 4.672 (brd)                                  |
| Porifersta-5,7,25(27)-<br>trienol<br>(C <sub>29</sub> )       | 23                     | 0.85                    | 0.612 (s) | 0.942 (s) | 0.939 (d) | 1.567 (s) | 4.672<br>(brs)         |           | 0.803 (t) | H6, 5.573 (dd)<br>H7, 5.380 (m)<br>H27, 4.672 (brd)                 |
| Porifertsa-5,7,22E,25(27)-<br>tetraenol<br>(C <sub>29</sub> ) | 24                     | 0.76 <sup>c</sup>       | 0.63 (s)  | 0.945 (s) | 1.038 (s) | 1.645 (s) | 4.694 (t)<br>4.709 (t) |           | 0.835 (t) | H6, 5.569 (dd)<br>H7, 5.387 (m)<br>H22, 5.221 (m)<br>H23, 5.221 (m) |

<sup>a</sup>Structures of sterols are shown in Figure 7. <sup>1</sup>HNMR was performed at 500 MHz with samples referenced to chloroform  $\delta$  7.265ppm; s, singlet, d, doublet, brd, broad doublet, m, multiplet. <sup>b</sup>The  $\alpha_c$  values correspond to the chromatographic times of the C24-alkylated sterol relative to cholesterol in HPLC. <sup>c</sup>Compounds first collected on the Luna C<sub>18</sub>- column then purified using the TSK-Gel C<sub>18</sub>- column as described in Methods.
